# Supplementary material
Source: publisher site journal article supplement (https://www.dovepress.com/article/399835)

***Supplementary Item 1.*** Animation depicting the surgical procedure used for core osteostixis of the navicular bone (still image here is used simply to indicate this animation would be available to readers as supplementary material)


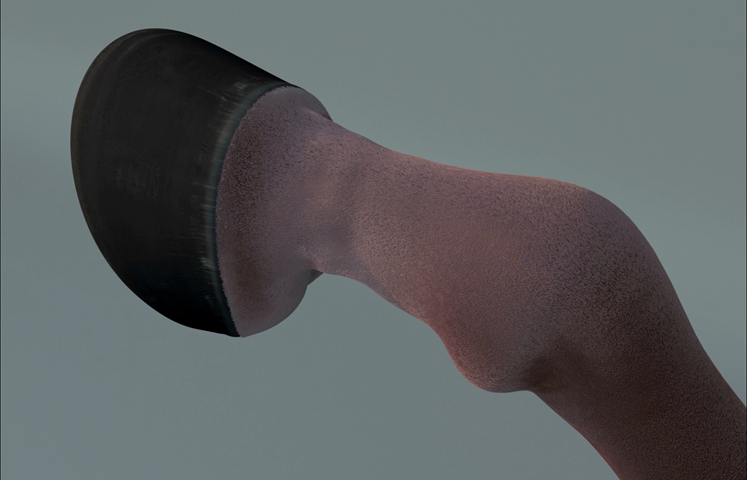

Supplement: Supplementary file 1 [file get_supplementary_file.php]
